# Supplementary material for: Tumor suppression by miR-31 in esophageal carcinoma is p21-dependent
Source: PubMed Central journal article supplement (PMC4279440; doi:10.18632/genesandcancer.38), 2014-11
Supplement: ganc-05-436-s001.pdf [file ganc-05-436-s001.pdf]

**Tumor suppression by miR-31 in esophageal carcinoma is p21-dependent – Ning et al**

**Supplementary table 1. Interference sequence of p21 shRNA**

| shRNA            | Sequence (3'-5')                                  |
|------------------|---------------------------------------------------|
| shRNA 1          | GAGGGUGUUACGACUUAUAGAGAACTAUUUCAGCAUU<br>GUGGGAG  |
| shRNA 2          | GGAGGGUGUUACGACUUAUGAGAACTAUUUCAGCAUUG<br>UGGGAGG |
| shRNA 3          | CCCUCAUCAACAGAAAGGAGAGAACTAGGAAAGACAAC<br>UACUCCC |
| Negative control | GCAAGCTGACCCTGAAGTTGAGAACTTTGAAGTCCCAGT<br>CGAACG |

**Supplementary table 2. List of primers used in real-time RT-PCR analysis**

| Name of the gene | Accession No | Forward Seq. (5'-3')       | Reverse Seq. (5'-3')       | Amplicon size (bp) |
|------------------|--------------|----------------------------|----------------------------|--------------------|
| GAPDH            | NM_002046.4  | GCACCGTCAAGGCTGAGA<br>AC   | TGGTGAAGACGCCAGTGG<br>A    | 138                |
| E2F2             | NM_004091.3  | TGAGCTTCAAGCACCTGAC<br>TGA | TTGCCAACAGCACGGATAT<br>C   | 82                 |
| STK40            | NM_032017.1  | CGTGCACAGAGACCTGAA<br>GCT  | GAGGCAGAAGTTGGTGAT<br>GGTT | 79                 |
| U6               | NM_004394.1  | CTCGCTTCGGCAGCACA          | AACGCTTCACGAATTTGCG<br>T   | 106                |
| miR-31           | NR_029505.1  | GCCGCAGGCAAGATGCTGG<br>C   | CAGTGCAGGGTCCGAGGT         | 71                 |
